# Supplementary material
Source: Springer Nature journal article supplement (https://www.springermedizin.de/resource/supplementary/12992_2009_59_MOESM9_ESM.pdf/9616404)

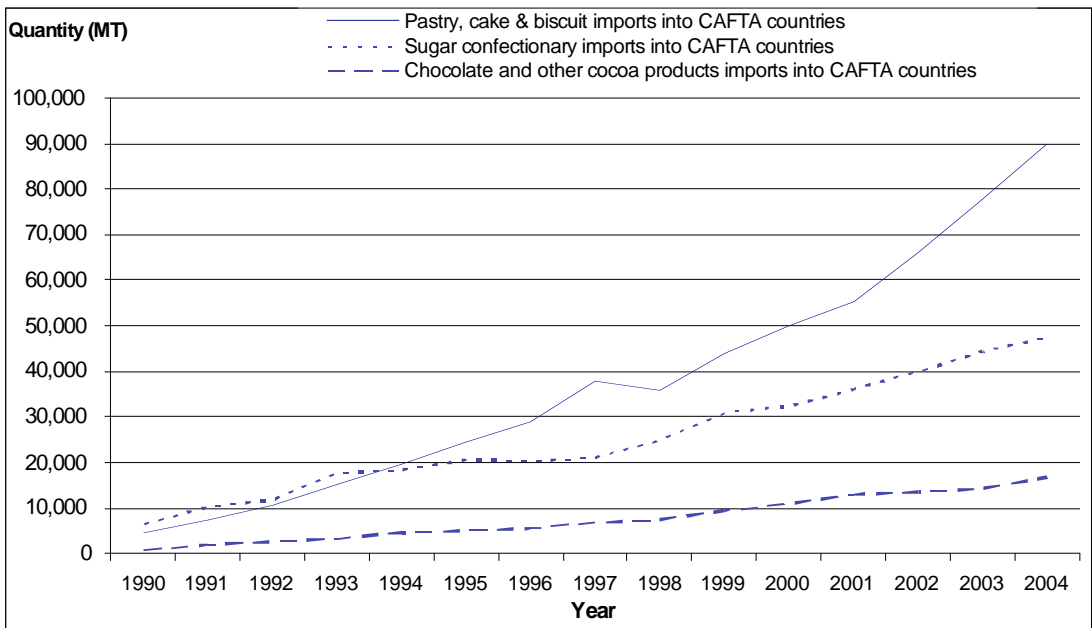

Supplement: MOESM9 [file 9616404]
